# Supplementary material for: Identification of QTLs for fruit quality traits in Japanese apples: QTLs for early ripening are tightly related to preharvest fruit drop
Source: PubMed Central journal article supplement — Breed Sci. 2014 Sep 1;64(3):240–51. doi: 10.1270/jsbbs.64.240 (PMC4154613; doi:10.1270/jsbbs.64.240), 2014-09-01
Supplement: 64_240_s2.pdf [file 64_240_s2.pdf]

Supplemental Table 1. Newly designed SSR markers.

| SSR name    | Contig number<br>(Apple Genome V1.0 contigs<br>by Velasco et al. (2010)) | Forward primer        | Reverse primer        | Motif    | Predicted<br>product size<br>(bp) |
|-------------|--------------------------------------------------------------------------|-----------------------|-----------------------|----------|-----------------------------------|
| Mdo.chr1.01 | MDC029632.22                                                             | TTCTAAACCAATCCAACCGC  | ACGCGCGTATTCTCTCATTT  | (AT)15   | 303                               |
| Mdo.chr1.05 | MDC013694.193                                                            | ACCCAAGTCTCATCTGCACC  | CATGAGTGAACAGGGGGACT  | (TC)20.5 | 347                               |
| Mdo.chr1.06 | MDC010753.200                                                            | TGCAGTTCCTCGACTCATTG  | ATGGTGTCTTTGGGTTGAAG  | (AT)11   | 350                               |
| Mdo.chr1.08 | MDC021770.295                                                            | CGTCCTAGATAGATGCCCCA  | CAGGACTCTAAGGACTGCCG  | (TA)14.5 | 223                               |
| Mdo.chr1.09 | MDC009959.204                                                            | TGTAAGTGAACGTAGCGTCCG | TTTACAGCTACCGACACCCC  | (AG)11   | 232                               |
| Mdo.chr1.10 | MDC006308.247                                                            | AAAAATCGGGATCTCTTCCC  | TTGCTATCAATTCCCAAGCC  | (GT)10   | 221                               |
| Mdo.chr1.11 | MDC016506.307                                                            | TGACTAAATCGGCAGTTCAC  | CTTTGTCAACCAAAAAGAGGG | (GA)24   | 321                               |
| Mdo.chr1.15 | MDC004709.213                                                            | GGCCTGTAAAAGAGGGAACC  | GGCTTTTTCTCCGTCCTTCT  | (CT)12   | 204                               |
| Mdo.chr1.18 | MDC012246.295                                                            | CGTGTCCACAAGCTGAGAAA  | AGGGATCCCCTCTACTGTT   | (TC)13   | 283                               |
| Mdo.chr1.19 | MDC013459.136                                                            | TTATTGACGGCCTTTGGTGT  | CGAGCGAGCTTCTTTGTTCT  | (TA)10.5 | 332                               |
| Mdo.chr1.21 | MDC022241.434                                                            | TGCTGGCTATCTGCTACCCT  | TGCTCTTCCTCTCCTCCCA   | (GA)15.5 | 323                               |
| BCA141      | -                                                                        | ACCAAACCCAGACCAAA     | TGTCCTTCTCATCATCTCTC  | (GA)5    | 121                               |

Supplemental Table 2. Overview of the genetic maps constructed for ‘Orin’ and ‘Akane’ (Fig. 1).

|         | Linkage Group                        | 1                   | 2    | 3    | 4    | 5    | 6    | 7    | 8    | 9    | 10     | 11   | 12   | 13   | 14   | 15     | 16   | 17       | Total  |
|---------|--------------------------------------|---------------------|------|------|------|------|------|------|------|------|--------|------|------|------|------|--------|------|----------|--------|
| ‘Orin’  | Genetic Distance (cM)                | 71.5                | 70.6 | 72.6 | 67.0 | 65.5 | 47.1 | 67.2 | 57.5 | 69.6 | 73.2   | 74.4 | 56.1 | 14.2 | 56.3 | 92.5   | 69.2 | 70.8     | 1095.3 |
|         | Number of loci (apple <sup>a</sup> ) | 15 (1) <sup>b</sup> | 9    | 5    | 10   | 10   | 6    | 9    | 11   | 11   | 16 (1) | 10   | 17   | 2    | 10   | 21 (2) | 6    | 14 (1)   | 182    |
|         | Number of loci (pear <sup>a</sup> )  | 5                   | 1    | 4    | 9    | 1    | 2    | 3    | 5    | 3    | 4      | 5    | 3    | 0    | 5    | 7      | 7    | 5        | 69     |
|         | Marker Density (cM/marker)           | 3.6                 | 7.1  | 8.1  | 3.5  | 6.0  | 5.9  | 5.6  | 3.6  | 5.0  | 3.7    | 5.0  | 2.8  | 7.1  | 3.8  | 3.3    | 5.3  | 3.7      | 4.4    |
| ‘Akane’ | Genetic Distance (cM)                | 64.1                | 69.8 | 81.8 | 56.6 | 80.8 | 63.4 | 73.0 | 54.3 | 69.4 | 73.1   | 77.2 | 56.9 | 60.4 | 33   | 99.1   | 41.3 | 42.5+1.5 | 1098.2 |
|         | Number of loci (apple <sup>a</sup> ) | 7                   | 8    | 5    | 10   | 17   | 13   | 13   | 11   | 9    | 21     | 15   | 20   | 10   | 15   | 19 (1) | 10   | 14+2     | 219    |
|         | Number of loci (pear <sup>a</sup> )  | 4                   | 3    | 3    | 7    | 4    | 0    | 4    | 4    | 2    | 8      | 8    | 0    | 5    | 4    | 7      | 3    | 6+0      | 72     |
|         | Marker Density (cM/marker)           | 5.8                 | 6.3  | 10.2 | 3.3  | 3.8  | 4.9  | 4.3  | 3.6  | 6.3  | 2.5    | 3.4  | 2.8  | 4.0  | 1.7  | 3.8    | 3.2  | 2.0      | 3.8    |

For ‘Akane’, LG17 is divided into LG17-1 and LG17-2.

<sup>a</sup>Number of loci is presented separately for loci detected using primer pairs designed from apple and pear sequences.

<sup>b</sup>Numbers in parentheses represent the number of loci detected using a gene-specific marker.

Marker density was calculated by dividing the genetic distance by the number of loci.

Supplemental Table 3. Significant QTLs detected in the ‘Orin’ × ‘Akane’ F1 population in each year .

| Map                              | Orin                      |             |             |               |                        |                           |                  | Akane          |           |            |               |                    |                           |                |                |  |
|----------------------------------|---------------------------|-------------|-------------|---------------|------------------------|---------------------------|------------------|----------------|-----------|------------|---------------|--------------------|---------------------------|----------------|----------------|--|
|                                  | Traits                    | Year        | LG          | Position (cM) | LOD                    | Significance <sup>a</sup> | % var.           | Nearest marker | Year      | LG         | Position (cM) | LOD                | Significance <sup>a</sup> | % var.         | Nearest marker |  |
| Harvest                          |                           |             |             |               |                        |                           |                  |                | 2010      | 3          | 59.5          | 3.52               | **                        | 17.8           | NB109a         |  |
|                                  |                           |             |             |               |                        |                           |                  |                | 2011      | 3          | 60.5          | 5.13               | ****                      | 17.1           | NB109a         |  |
|                                  |                           |             |             |               |                        |                           |                  |                | 2012      | 3          | 69.2          | 6.49               | *****                     | 19.8           | NH030a-2       |  |
|                                  |                           | <i>2011</i> | <i>6</i>    | <i>3.5</i>    | <i>3.70</i>            | <i>***</i>                | <i>9.3</i>       | <i>Hi08g03</i> |           |            |               |                    |                           |                |                |  |
|                                  |                           | 2010        | 15          | 69.2          | 3.10                   | **                        | 13.3             | CH02d11        | 2010      | 10         | 31.9          | 2.66               | *                         | 11.4           | CH02c11        |  |
|                                  |                           | 2011        | 15          | 65.2          | 4.27                   | ***                       | 10.8             | MdACS1         | 2012      | 10         | 30.9          | 3.05               | **                        | 8.7            | CH02c11        |  |
|                                  |                           | 2010        | 16          | 26.1          | 3.05                   | **                        | 13.0             | TsuENH182-2    |           |            |               |                    |                           |                |                |  |
|                                  |                           | 2011        | 16          | 31.1          | 6.97                   | *****                     | 18.7             | TsuENH182-2    |           |            |               |                    |                           |                |                |  |
|                                  |                           | 2012        | 16          | 31.1          | 3.94                   | ***                       | 14.6             | TsuENH182-2    |           |            |               |                    |                           |                |                |  |
|                                  | Russet-Calyx <sup>b</sup> | 2010        | 2           | 3.0           | 3.83                   | *** (KW: *****)           | 19.1             | Hi22d06        | 2010      | 2          | 59.8          | 2.45               | * (KW: ***)               | 12.7           | TsuENH087      |  |
|                                  |                           |             |             |               |                        |                           |                  | 2011           | 2         | 50.4       | 5.80          | ***** (KW: *****)  | 19.1                      | MEST142        |                |  |
|                                  |                           |             |             |               |                        |                           |                  | <i>2012</i>    | <i>10</i> | <i>8.8</i> | <i>2.34</i>   | <i>*</i> (KW: ***) | <i>8.8</i>                | <i>MEST111</i> |                |  |
| Russet-Pedice1 <sup>b</sup>      | 2011                      | 4           | 55.9        | 2.78          | ** (KW: *****)         | 9.7                       | NB141b           |                |           |            |               |                    |                           |                |                |  |
|                                  | 2011                      | 8           | 19.0        | 2.45          | * (KW: ***)            | 7.8                       | CH01c06          |                |           |            |               |                    |                           |                |                |  |
|                                  | 2012                      | 8           | 34.9        | 2.23          | ** (KW: *****)         | 8.4                       | Mdo.chr1.01      | 2010           | 6         | 39.0       | 2.64          | * (KW: *****)      | 11.4                      | CH03d12        |                |  |
|                                  |                           |             |             |               |                        |                           |                  | 2012           | 6         | 38.6       | 2.28          | * (KW: *****)      | 8.6                       | CH03d12        |                |  |
|                                  |                           |             |             |               |                        |                           |                  | 2010           | 15        | 87.0       | 3.22          | ** (KW: *****)     | 16.4                      | MEST128        |                |  |
|                                  |                           |             |             |               |                        |                           |                  | 2011           | 15        | 86.3       | 3.22          | ** (KW: *****)     | 11.1                      | Hi11a01        |                |  |
| Depth of Skin Color <sup>b</sup> | <i>2011</i>               | <i>6</i>    | <i>39.4</i> | <i>3.50</i>   | <i>*** (KW: *****)</i> | <i>12.0</i>               | <i>TsuENH126</i> |                |           |            |               |                    |                           |                |                |  |
|                                  |                           |             |             |               |                        |                           |                  | 2010           | 9         | 69.4       | 3.17          | ** (KW: ****)      | 14.2                      | EMPC115        |                |  |
|                                  |                           |             |             |               |                        |                           |                  | 2011           | 9         | 69.4       | 3.49          | *** (KW: *****)    | 12.0                      | EMPC115        |                |  |
|                                  |                           |             |             |               |                        |                           |                  | 2012           | 9         | 69.4       | 2.89          | * (KW: *****)      | 11.1                      | EEMPC115       |                |  |
|                                  |                           |             |             |               |                        |                           |                  | 2010           | 16        | 19.5       | 2.62          | ** (KW: ***)       | 11.5                      | Hi15a13        |                |  |
| Juiciness                        | 2011                      | 16          | 4.0         | 2.72          | *                      | 9.5                       | Hi22f06          |                |           |            |               |                    |                           |                |                |  |

The peak with the highest LOD is presented as the QTL, followed by its position and the percentage of the phenotypic variance that it explained (% var.).

<sup>a</sup> Asterisks (\*, \*\*, \*\*\*, \*\*\*\*, \*\*\*\*\*) represent significance level of  $p < 0.10$ ,  $< 0.05$ ,  $< 0.01$ ,  $< 0.001$ ,  $< 0.0001$  respectively. <sup>b</sup> The significance of QTLs for traits with a non-normal distribution was confirmed using the Kruskal-Wallis (KW) single-locus analysis, using the nearest marker. Major QTLs that explained  $> 20\%$  variance are indicated in bold. QTLs undetected in the analyses using average value of data during 2 or 3 years (Table 3) are shown by italic.

Supplemental Table 3. (Continued)

| Map                                | Orin              |           |               |             |                           |                    |                | Akane             |             |               |              |                           |                    |                    |                  |                |
|------------------------------------|-------------------|-----------|---------------|-------------|---------------------------|--------------------|----------------|-------------------|-------------|---------------|--------------|---------------------------|--------------------|--------------------|------------------|----------------|
|                                    | Year              | LG        | Position (cM) | LOD         | Significance <sup>a</sup> | % var.             | Nearest marker | Year              | LG          | Position (cM) | LOD          | Significance <sup>a</sup> | % var.             | Nearest marker     |                  |                |
| Firmness                           | 2011              | 10        | 44.0          | 3.83        | ***                       | 13.2               | CH02c11        |                   |             |               |              |                           |                    |                    |                  |                |
|                                    | 2012              | 11        | 6.9           | 2.63        | *                         | 9.8                | IPP02          |                   |             |               |              |                           |                    |                    |                  |                |
|                                    |                   |           |               |             |                           |                    |                | 2012              | 3           | 74.2          | 2.60         | *                         | 9.7                | NH030a-2           |                  |                |
| Weight                             | 2011              | 11        | 74.4          | 2.87        | *                         | 10.0               | CH04d07        |                   |             |               |              |                           |                    |                    |                  |                |
|                                    | 2012              | 17        | 23.8          | 2.84        | **                        | 10.8               | Hi03c05        |                   |             |               |              |                           |                    |                    |                  |                |
| Preharvest Fruit Drop <sup>b</sup> | 2012              | 3         | 66.0          | 2.69        | *                         | (KW: ****)         | 7.2            | NB109a            |             |               |              |                           |                    |                    |                  |                |
|                                    | <b>2011</b>       | <b>15</b> | <b>62.5</b>   | <b>7.68</b> | <b>*****</b>              | <b>(KW: *****)</b> | <b>24.5</b>    | <b>MdACS1</b>     | 2011        | 5             | 14.1         | 3.71                      | ***                | (KW: *****)        | 12.7             | CH03a09        |
|                                    | <b>2012</b>       | <b>15</b> | <b>62.5</b>   | <b>8.43</b> | <b>*****</b>              | <b>(KW: *****)</b> | <b>28.2</b>    | <b>MdACS1</b>     |             |               |              |                           |                    |                    |                  |                |
|                                    |                   |           |               |             |                           |                    |                |                   | 2011        | 8             | 26.8         | 3.97                      | ***                | 10.0               | CH02g09          |                |
| Acidity                            |                   |           |               |             |                           |                    |                |                   | 2012        | 8             | 27.8         | 4.38                      | ***                | 12.6               | CH02g09          |                |
|                                    |                   |           |               |             |                           |                    |                |                   | 2012        | 15            | 42.7         | 2.50                      | *                  | 6.3                | MdACS3           |                |
|                                    | <b>2011</b>       | <b>16</b> | <b>9.1</b>    | <b>6.83</b> | <b>*****</b>              | <b>22.4</b>        | <b>CH05c06</b> | <b>2011</b>       | <b>16</b>   | <b>6.2</b>    | <b>9.51</b>  | <b>*****</b>              | <b>26.6</b>        | <b>Hi12a02</b>     |                  |                |
|                                    | <b>2012</b>       | <b>16</b> | <b>8.1</b>    | <b>6.38</b> | <b>*****</b>              | <b>22.2</b>        | <b>CH05c06</b> | <b>2012</b>       | <b>16</b>   | <b>6.2</b>    | <b>6.82</b>  | <b>*****</b>              | <b>20.5</b>        | <b>Hi12a02</b>     |                  |                |
| °Brix                              | 2011              | 15        | 63.2          | 3.72        | ***                       | 10.7               | MdACS1         |                   |             |               |              |                           |                    |                    |                  |                |
|                                    | 2012 <sup>b</sup> | 15        | 62.5          | 2.65        | *                         | (KW: **)           | 8.6            | MdACS1            |             |               |              |                           |                    |                    |                  |                |
|                                    | 2011              | 16        | 20.1          | 6.78        | *****                     | 19.8               | TsuENH182-2    | 2012 <sup>b</sup> | 16          | 22.5          | 3.50         | **                        | (KW: ****)         | 12.9               | Hi01a08          |                |
|                                    | 2012 <sup>b</sup> | 16        | 12.6          | 3.86        | ***                       | (KW: ****)         | 14.1           | CH05c06           |             |               |              |                           |                    |                    |                  |                |
| Sucrose                            |                   |           |               |             |                           |                    |                | 2012              | 10          | 26.3          | 4.21         | ***                       | 14.3               | TsuENH109          |                  |                |
| Glucose                            |                   |           |               |             |                           |                    |                | 2012              | 15          | 92.5          | 3.06         | **                        | 10.1               | MEST147            |                  |                |
| Fructose                           |                   |           |               |             |                           |                    |                | 2012              | 5           | 0.0           | 3.34         | **                        | 12.4               | Hi09b04            |                  |                |
|                                    |                   |           |               |             |                           |                    |                | 2012              | 6           | 8.6           | 3.27         | **                        | 10.9               | CH03d07            |                  |                |
|                                    |                   |           |               |             |                           |                    |                | 2012              | 16          | 18.5          | 3.00         | **                        | 10.0               | Hi15a13            |                  |                |
| Sorbitol <sup>b</sup>              | 2012              | 12        | 23.6          | 2.79        | *                         | (KW: ****)         | 10.5           | CH05d11           |             |               |              |                           |                    |                    |                  |                |
|                                    |                   |           |               |             |                           |                    |                | 2012              | 16          | 15.5          | 3.74         | ***                       | (KW: ****)         | 13.8               | Hi15a13          |                |
| Juice browning <sup>b</sup>        | 2012              | 10        | 54.6          | 2.72        | *                         | (KW: ***)          | 10.2           | Hi22f04           | 2012        | 10            | 19.3         | 4.89                      | ****               | (KW: *****)        | 11.5             | NH039a         |
|                                    |                   |           |               |             |                           |                    |                | <b>2012</b>       | <b>16</b>   | <b>9.3</b>    | <b>10.55</b> | <b>*****</b>              | <b>(KW: *****)</b> | <b>28.2</b>        | <b>TsuENH022</b> |                |
| Flowering date <sup>b</sup>        | 2012              | 8         | 38.3          | 3.92        | ***                       | (KW: ****)         | 14.4           | IPP019            | <b>2012</b> | <b>15</b>     | <b>86.3</b>  | <b>9.63</b>               | <b>*****</b>       | <b>(KW: *****)</b> | <b>31.8</b>      | <b>Hi09f01</b> |
